# Supplementary material for: Surface-Catalyzed Zinc Oxide Nanorods and Interconnected Tetrapods as Efficient Methane Gas Sensing Platforms
Source: MDPI journal article supplement (doi:10.3390/chemosensors11090506), 2023-09-17
Supplement: s1 [file s1]

## SUPPORTING INFORMATION

### SURFACE-CATALYZED ZINC OXIDE NANORODS AND INTERCONNECTED TETRAPODS AS EFFICIENT METHANE GAS SENSING PLATFORMS

Abbey Knoepfel, Bed Poudel\*, and Sanju Gupta\*

Department of Materials Science and Engineering, Pennsylvania State University, University Park, PA 16802 (USA)

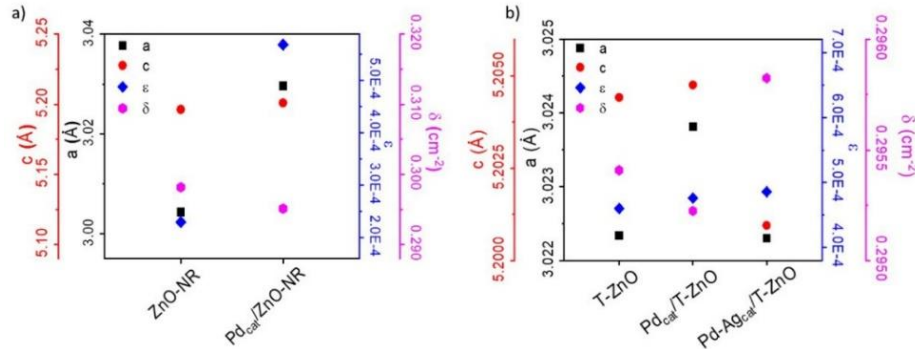

**Figure S1.** Calculations from the obtained XRD spectra in Fig. 1: (a) Lattice constants,  $c$  and  $a$ , lattice strain,  $\epsilon$ , and dislocation density,  $\delta$ , of ZnO-NR and Pd<sub>cat</sub>/ZnO-NR; (b) Lattice constants,  $c$  and  $a$ , lattice strain,  $\epsilon$ , and dislocation density,  $\delta$ , of T-ZnO, Pd<sub>cat</sub>/T-ZnO, and Pd-Ag<sub>cat</sub>/T-ZnO.

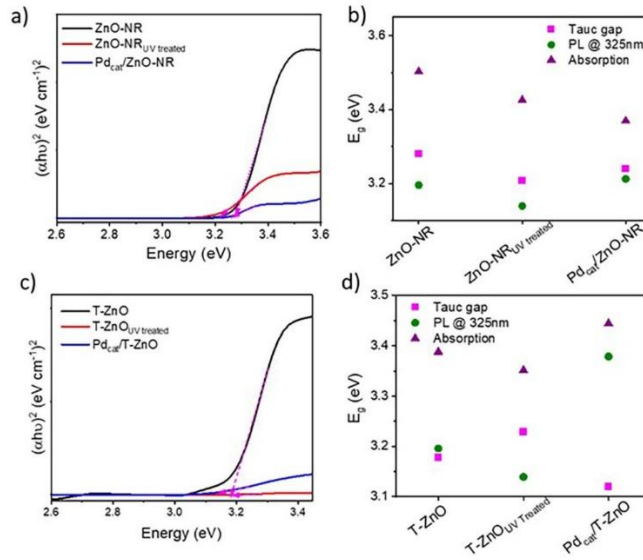

**Figure S2.** (a) Tauc plots of ZnO-NR, ZnO-NR<sub>UV treated</sub>, and Pd<sub>cat</sub>/ZnO-NR; (b) Comparison of bandgap values,  $E_g$ , determined from UV-visible spectra, photoluminescence spectra, and Tauc plot of ZnO-NR, ZnO-NR<sub>UV treated</sub>, and Pd<sub>cat</sub>/ZnO-NR; (c) Tauc plots of T-ZnO, T-ZnO<sub>UV treated</sub>, and Pd<sub>cat</sub>/T-ZnO; (d) Comparison of bandgap values,  $E_g$ , determined from UV-visible spectra, photoluminescence spectra, and Tauc plot of T-ZnO, T-ZnO<sub>UV treated</sub>, and Pd<sub>cat</sub>/T-ZnO.

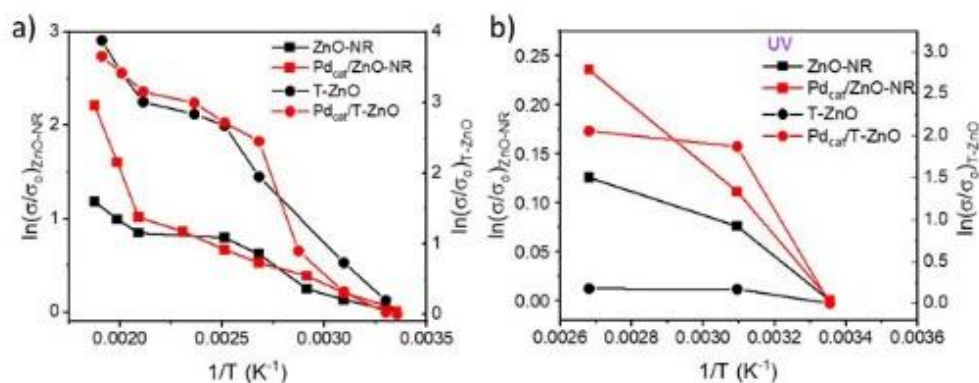

**Figure S3.** Conductivity measurements as a function of temperature in air for ZnO-NR and T-ZnO with and without Pd catalyst: (a) Conductivity in dark chamber; (b) Conductivity under UV excitation in chamber ( $\lambda = 365$  nm).

**Table S1.** Activation energy determined from conductivity measurements as a function of temperature in air for ZnO-NR and T-ZnO with and without Pd catalyst in the dark and under UV excitation ( $\lambda = 365$  nm).

| Sample                    | $E_A$ (eV)<br>UV<br>OFF | $E_A$ (eV)<br>UV<br>ON |
|---------------------------|-------------------------|------------------------|
| ZnO-NR                    | 0.31                    | 0.024                  |
| Pd <sub>cat</sub> /ZnO-NR | 0.24                    | 0.06                   |
| T-ZnO                     | 0.51                    | 0.10                   |
| Pd <sub>cat</sub> /T-ZnO  | 0.54                    | 0.09                   |

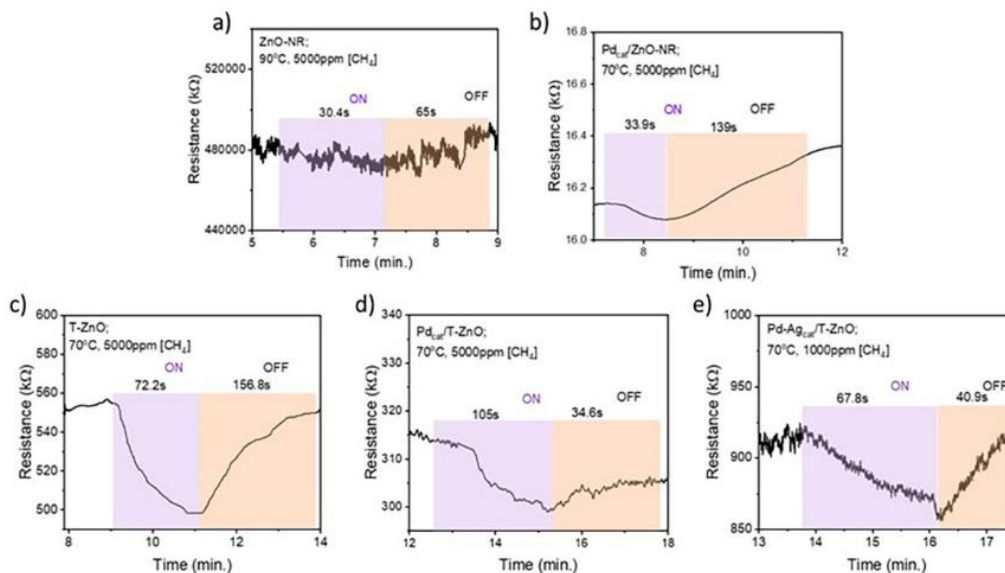

**Figure S4.** Low temperature dynamic resistance curves for response/recovery times when exposed to CH<sub>4</sub> for (a) ZnO-NR; (b) Pd<sub>cat</sub>/ZnO-NR; (c) T-ZnO; (d) Pd<sub>cat</sub>/T-ZnO; (e) Pd-Ag<sub>cat</sub>/T-ZnO films.

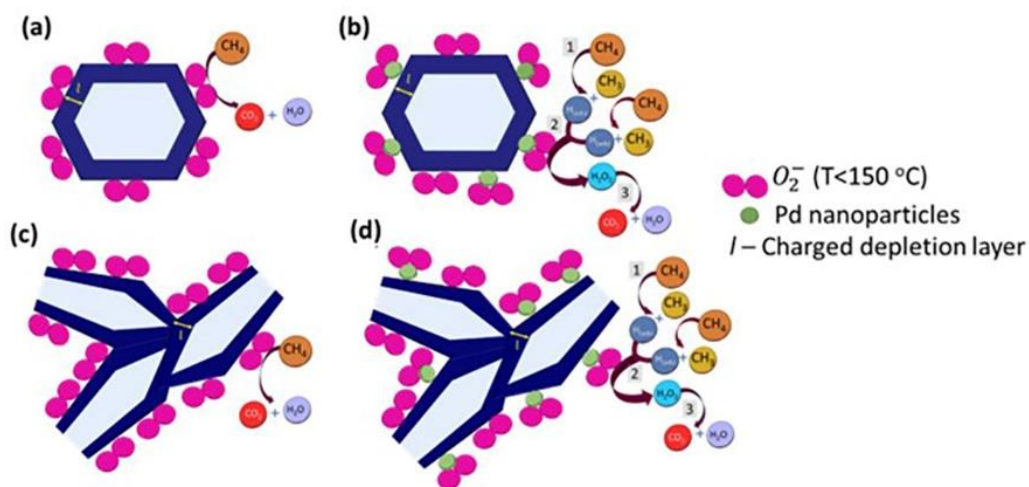

**Figure S5.** Proposed mechanistic chemical pathways for low temperature (<150 °C) thermal excitation for unmodified and Pd-decorated films: (a) ZnO-NR, b) Pd<sub>cat</sub>/ZnO-NR, c) T-ZnO, d) Pd<sub>cat</sub>/T-ZnO sensors.
