# Supplementary material for: Surface-Catalyzed Zinc Oxide Nanorods and Interconnected Tetrapods as Efficient Methane Gas Sensing Platforms
Source: MDPI journal article supplement (doi:10.3390/chemosensors11090506), 2023-09-17
Supplement: s1 [file s1]

Archive with 1 entries (1 files):
- chemosensors-2569321-supplementary.pdf
